# Supplementary material for: Optical Coherence Tomography Predictors for a Favorable Vascular Response to Statin Therapy
Source: PubMed Central journal article supplement — J Am Heart Assoc. 2020 Dec 19;10(1):e018205. doi: 10.1161/JAHA.120.018205 (PMC7955485; doi:10.1161/jaha.120.018205), 2020-12-19
Supplement: JAH3-10-e018205-s001.pdf [file JAH3-10-e018205-s001.pdf]

# **SUPPLEMENTAL MATERIAL**

**Table S1. Univariable and multivariable analyses which analyze one randomly selected plaque from each patient (sensitivity analysis).**

|                                           | Univariable           |         | Multivariable         |         |
|-------------------------------------------|-----------------------|---------|-----------------------|---------|
|                                           | Odds ratio [95%CI]    | P value | Odds ratio [95%CI]    | P value |
| Baseline thin-cap area                    | 1.498 [1.025, 2.189]  | 0.037   | 1.293 [0.798, 2.096]  | 0.296   |
| TCFA (< 65µm)                             | 3.333 [1.137, 9.776]  | 0.028   | 1.496 [0.340, 6.580]  | 0.594   |
| Macrophage                                | 1.883 [0.653, 5.428]  | 0.241   |                       |         |
| Macrophage index<br>(per 10 increase)     | 1.066 [1.031, 1.103]  | < 0.001 | 1.049 [1.014, 1.085]  | 0.005   |
| Microvessel                               | 1.000 [0.366, 2.730]  | 1.000   |                       |         |
| Layered plaque                            | 5.667 [2.103, 15.270] | 0.001   | 4.631 [1.442, 14.869] | 0.010   |
| Cholesterol crystal                       | 0.440 [0.113, 1.709]  | 0.236   |                       |         |
| Spotty calcium                            | 1.000 [0.400, 2.501]  | 1.000   |                       |         |
| Baseline lipid index<br>(per 10 increase) | 1.008 [1.001, 1.014]  | 0.015   | 1.003 [0.991, 1.014]  | 0.666   |
| MLA                                       | 0.977 [0.673, 1.418]  | 0.903   |                       |         |

CI = confidence interval; FCT = fibrous-cap thickness; MLA = minimum lumen area; TCFA = thin-cap fibroatheroma.

**Table S2. Predictors for a favorable vascular response to statin therapy in statin naïve patients.**

|                                           | <b>Favorable response<br/>(n = 18)</b> | <b>Less favorable response<br/>(n = 36)</b> | <b>P value</b> |
|-------------------------------------------|----------------------------------------|---------------------------------------------|----------------|
| Intensity of Statin therapy               |                                        |                                             | 0.483          |
| High-intensity, n (%)                     | 1 (5.6)                                | 4 (11.1)                                    |                |
| Moderate-intensity, n (%)                 | 16 (88.9)                              | 27 (75.0)                                   |                |
| Low-intensity, n (%)                      | 1 (5.6)                                | 5 (13.9)                                    |                |
| Thin-cap area (Baseline), mm <sup>2</sup> | 7.308 (4.044 – 22.371)                 | 1.664 (0.482 – 4.068)                       | < 0.001        |
| Macrophage index (Baseline)               | 317.6 (105.9 – 416.0)                  | 139.3 (5.0 – 255.2)                         | 0.010          |
| Layered plaque (Baseline), n (%)          | 9 (50.0)                               | 11 (30.6)                                   | 0.163          |

Values are n (%), or median (interquartile range).

**Table S3. Univariable analysis of a favorable vascular response to statins in statin naïve patients.**

|                                       | <b>Univariable</b>        |                |
|---------------------------------------|---------------------------|----------------|
|                                       | <b>Odds ratio [95%CI]</b> | <b>P value</b> |
| Baseline thin-cap area                | 1.417 [1.006, 1.883]      | 0.016          |
| Macrophage index<br>(per 10 increase) | 1.052 [1.017, 1.087]      | 0.003          |
| Layered plaque                        | 2.273 [0.680, 7.592]      | 0.182          |

CI = confidence interval.

---

**Figure S1. Degree of thin-cap area change among the three groups based on the macrophage index at baseline.**

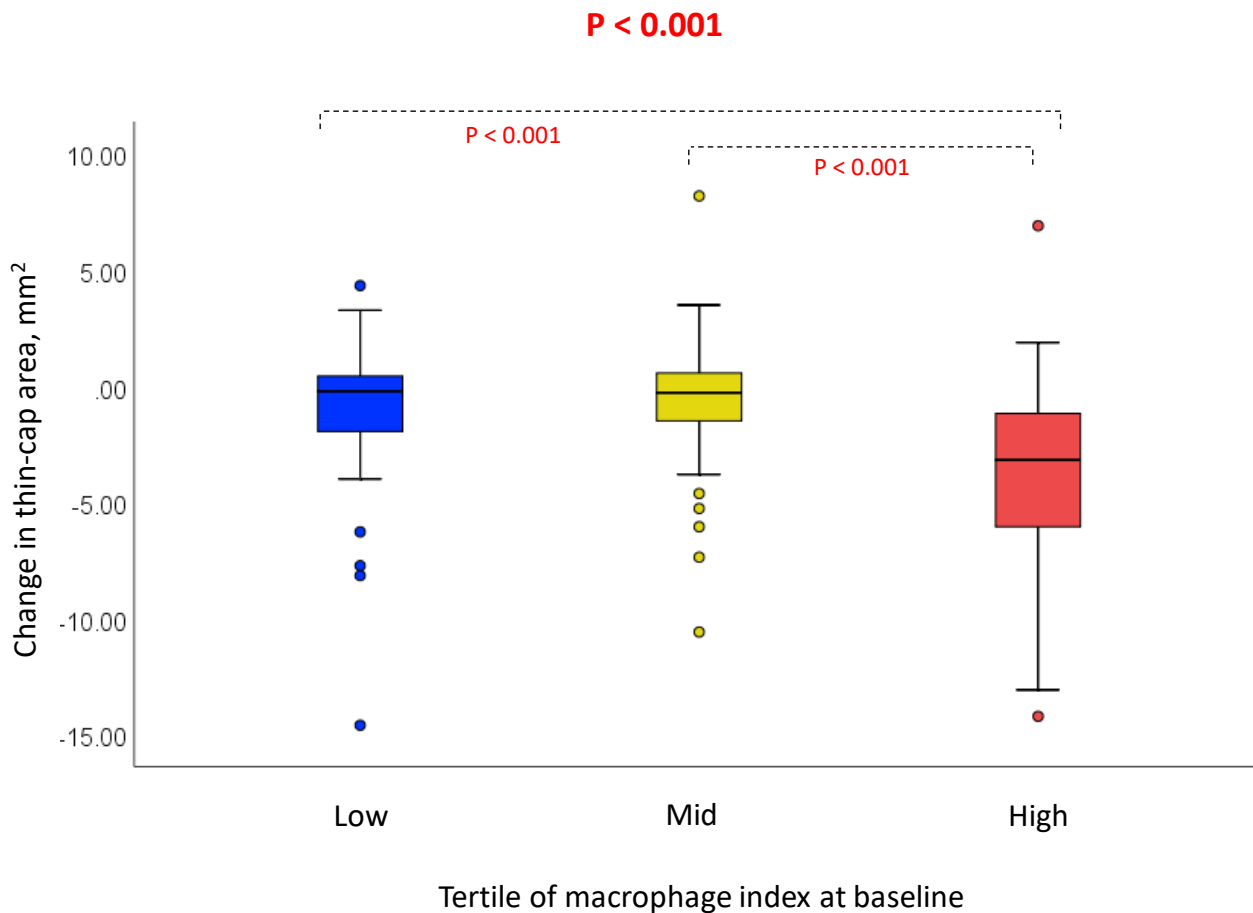

Non-culprit lipid plaques were divided into three groups based on the macrophage index at baseline (macrophage index at baseline: 0.0 [25<sup>th</sup>-75<sup>th</sup> percentile 0.0 to 35.0] in the low tertile, 136.5 [25<sup>th</sup>-75<sup>th</sup> percentile 85.8 to 169.0] in the mid tertile, 322.4 [25<sup>th</sup>-75<sup>th</sup> percentile 272.0 to 421.2] in the third tertile). The high tertile of macrophage index at baseline showed significantly greater reduction of thin-cap area than the low and mid tertiles (low tertile vs. mid tertile vs. high tertile: -0.220 [25<sup>th</sup>-75<sup>th</sup> percentile -1.961 to 0.553] vs. -0.287 [25<sup>th</sup>-75<sup>th</sup> percentile -1.530 to 0.580] vs. -3.177 [25<sup>th</sup>-75<sup>th</sup> percentile -6.300 to -1.015];  $p < 0.001$ ).

**Figure S2. Degree of thin-cap area change between the three groups based on the tertile of thin-cap area at baseline.**

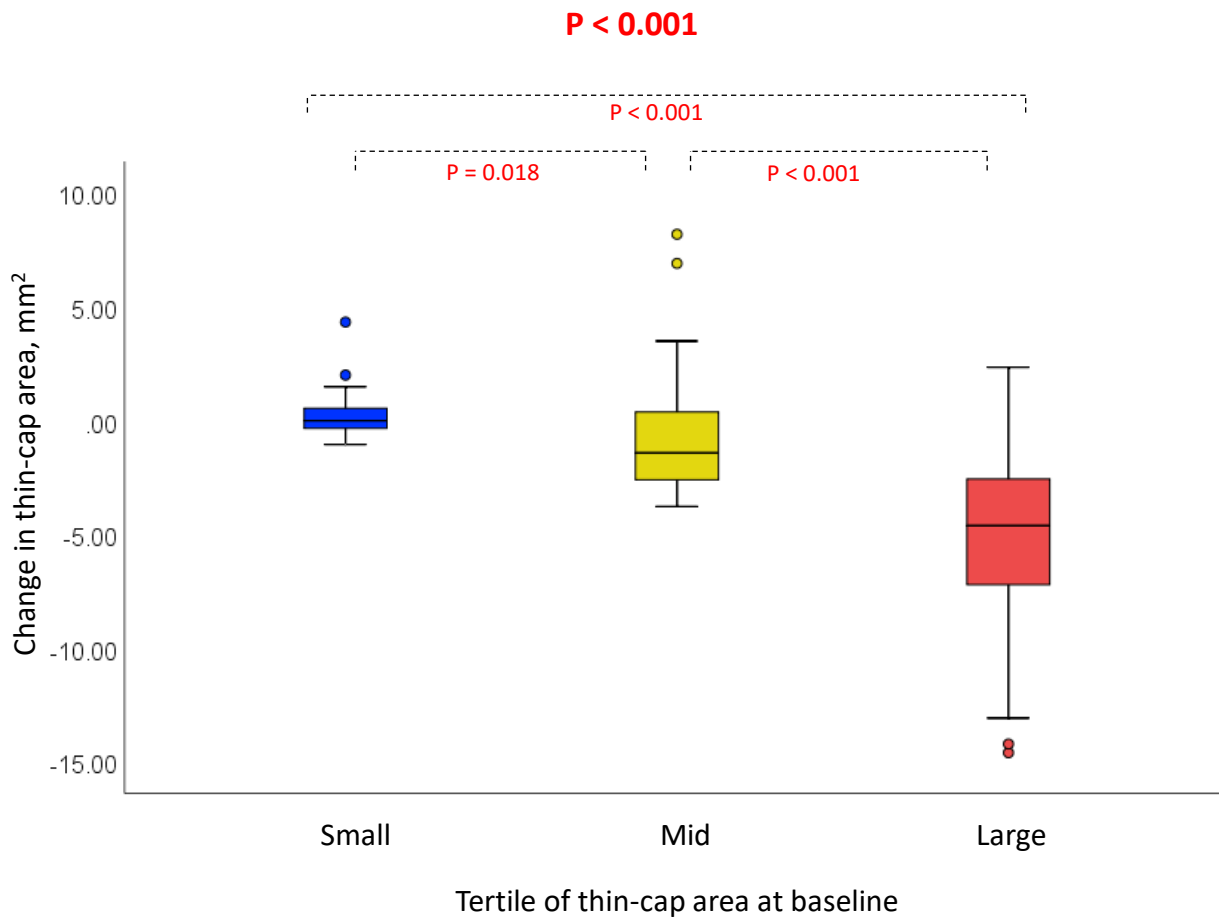

Non-culprit lipid plaques were divided into three groups based on the tertile of thin-cap area at baseline (thin-cap area at baseline: 0.505 [25<sup>th</sup>-75<sup>th</sup> percentile 0.195 to 1.066] in the small tertile, 2.852 [25<sup>th</sup>-75<sup>th</sup> percentile 2.153 to 3.698] in the mid tertile, 8.419 [25<sup>th</sup>-75<sup>th</sup> percentile 6.034 to 10.715] mm<sup>2</sup> in the large tertile). The reduction of thin-cap area was greatest in the large tertile of baseline thin-cap area, followed by the mid tertile, and small tertile (small tertile vs. mid tertile vs. large tertile: -0.010 [25<sup>th</sup>-75<sup>th</sup> percentile -0.355 to 0.553] vs. -1.427 [25<sup>th</sup>-75<sup>th</sup> percentile -2.620 to 0.440] vs. -4.624 [25<sup>th</sup>-75<sup>th</sup> percentile -7.368 to -2.440]; p < 0.001).

**Figure S3. Degree of thin-cap area change between the three groups based on the tertile of low-density lipoprotein cholesterol reduction.**

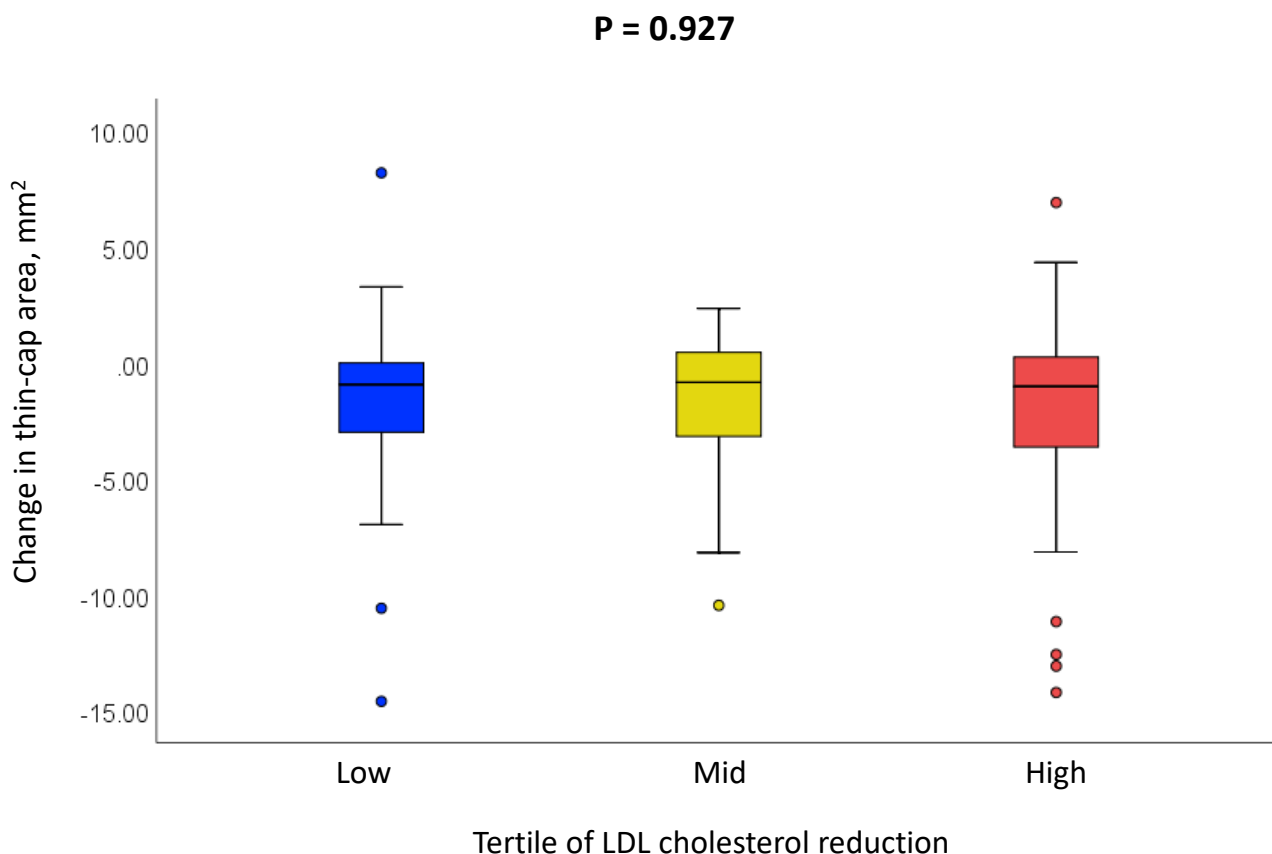

Non-culprit lipid plaques were divided into three groups based on the tertile of low-density lipoprotein (LDL) cholesterol reduction (LDL cholesterol reduction: 11.5 [25<sup>th</sup>-75<sup>th</sup> percentile 9.0 to 17.0] mg/dl in the low tertile, -11.8 [25<sup>th</sup>-75<sup>th</sup> percentile -18.1 to -6.3] mg/dl in the mid tertile, -53.8 [25<sup>th</sup>-75<sup>th</sup> percentile -62.2 to -43.0] mg/dl in the high tertile). The reduction of thin-cap area was not significantly different among the three tertiles (low tertile vs. mid tertile vs. high tertile: -0.942 [25<sup>th</sup>-75<sup>th</sup> percentile -3.103 to -0.008] vs. -0.804 [25<sup>th</sup>-75<sup>th</sup> percentile -3.183 to 0.480] vs. -1.026 [25<sup>th</sup>-75<sup>th</sup> percentile -3.682 to 0.277]; p = 0.927).

**Figure S4. Internal consistency of plaque responses within individual patients.**

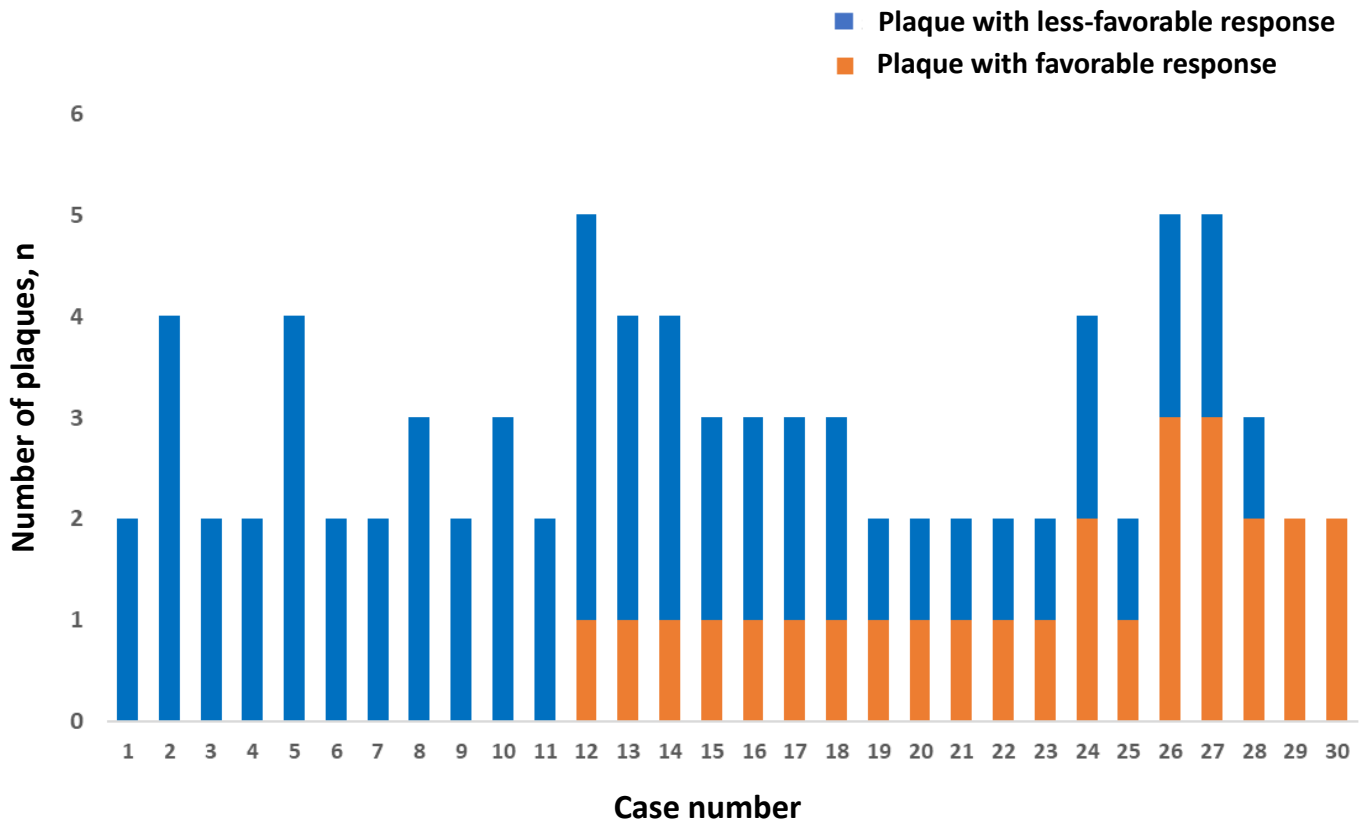

Among 84 patients, 30 patients had more than 2 non-culprit plaques. Of those, 11 patients had only plaques with a less-favorable response, 2 patients had only plaques with a favorable response, and 17 patients had both plaques with favorable and less-favorable responses.
